# Supplementary material for: Effect of early calf-hood nutrition on the transcriptomic profile of subcutaneous adipose tissue in Holstein-Friesian bulls
Source: PubMed Central journal article supplement (PMC5916831; doi:10.1186/s12864-018-4681-2), 2018-04-24

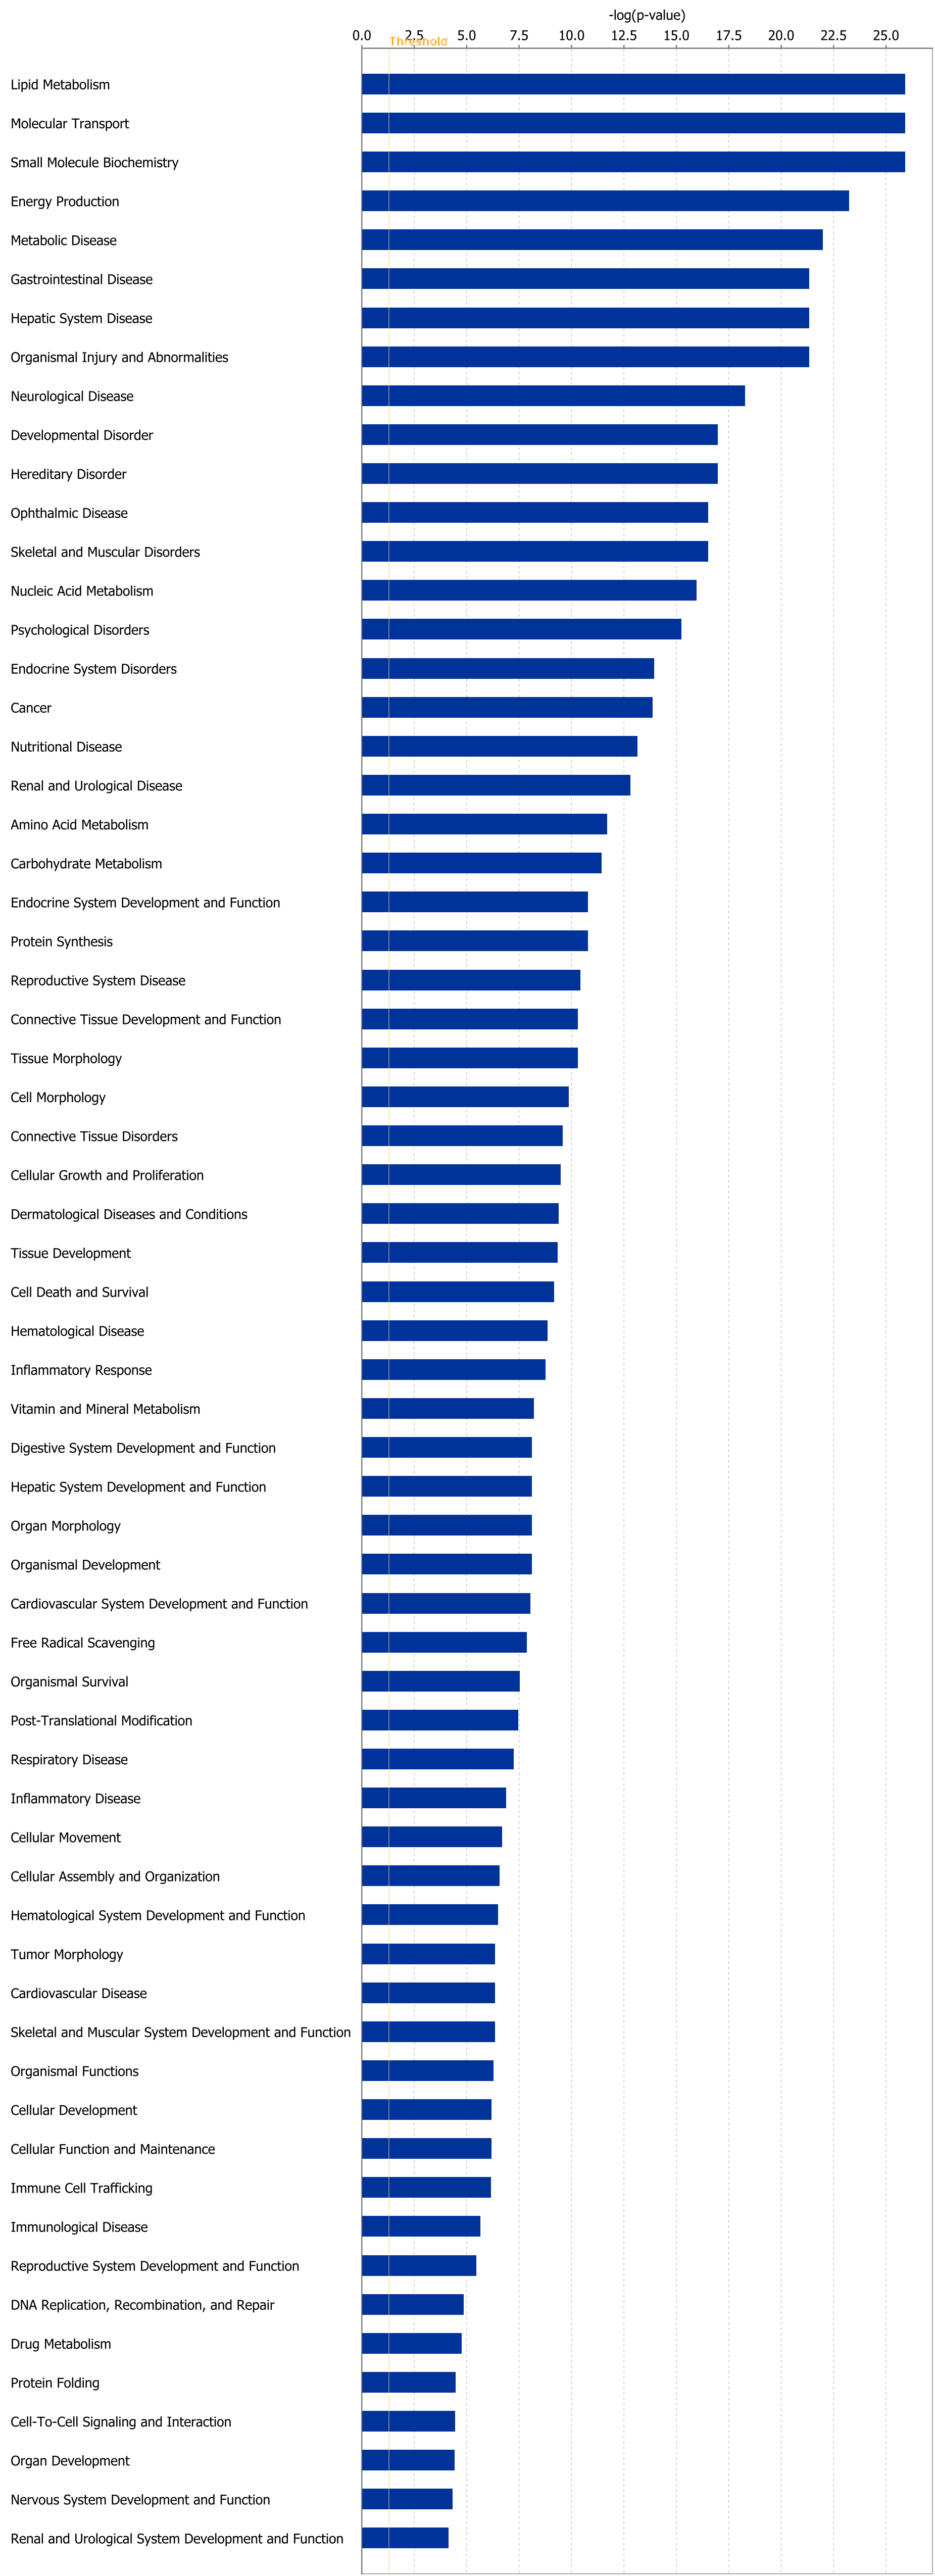

Supplement: 12864_2018_4681_MOESM1_ESM.pdf [file 12864_2018_4681_MOESM1_ESM.pdf]
